# Supplementary material for: Flamingo participates in multiple models of cell competition
Source: eLife. 2024 Dec 30;13:RP98535. doi: 10.7554/eLife.98535 (PMC11684786; doi:10.7554/eLife.98535)
Supplement: Supplementary file 1. [file elife-98535-supp1.xlsx]

## Sheet: Fig 2D
>>Myc	fmiE59 >>Myc	fmiE59 vs >>Myc
0.264235	-0.418972	0.524622
0.301919	-0.337418	0.361064
0.259063	-0.172981	0.345341
0.273962	-0.317181	0.398943
0.382692	-0.0922679
0.546903
0.455668
0.329775
0.401825
0.346714

## Sheet: Fig 2H and 6D
>>Myc	fmiE45 >>Myc	fmiE45 >>Myc fmiΔcad	>>Myc vs fmiE45
0.199826	-0.140339	0.230024	0.23348
0.234083	-0.164017	0.190253	0.083668
0.320188	-0.558081	0.0217864	-0.0344828
0.303987	-0.0971916	-0.0232235	-0.0411637
0.388857	-0.375086	-0.0448724	-0.418143
0.293149	-0.318053	0.106244	-0.180668
0.12629	-0.0583253	0.267727	0.247659
0.269856	-0.252284	0.131247	0.150863
0.105621	0.0678906	0.395129	0.612564
0.396836	-0.082565	0.340652	0.489965
0.184123	-0.266457	0.135018	0.469145
0.0512168	-0.770702	0.076161	0.41732
0.105596	-1.00257	0.0204813	0.542304
0.0742574	-0.300068	0.0346081
	-0.717075
	-0.599096
	-0.74876
	-0.39502
	-0.775254

## Sheet: Fig 2 Supplement 1C
RFP control	fmiE45
-0.0425114	-0.605041
-0.12193	0.232379
0.0258953	-0.25161
0.205346	-0.355371
0.0647107	-0.426947
0.180462	-0.0764846
-0.092721	-0.0116732
-0.0961377	0.247626
-0.122633	-0.063279
-0.11495	-0.0782463
-0.0717882	0.133137
-0.125447
0.0327666
-0.159185
-0.093996

## Sheet: Fig 2 Supplement 1F
GFP clones	RFP twin-spots
1066	1534
2519	1427
1548	1302
1631	1824
1929	2576
1159	1972
1641	3009
1824	1297
4078	4202
4603	4709

## Sheet: Fig 3M
RFP control	scrib RNAi	scrib RNAi, fmiE59	scrib RNAi vs fmiE59
0.370528	0.338443	0.199298	0.267389
0.472784	0.508777	0.227098	0.318344
0.470566	0.299529	0.104268	0.264421
0.534541	0.286705	0.171293	0.329075
0.416817	0.414752	0.15217	0.48123
0.467377	0.403075	0.120945	0.390138
0.553124	0.285752	0.213212	0.218156
0.51632	0.400475		0.313686
	0.404225		0.345588
	0.365684		0.241601
	0.335808		0.268399
	0.340511
	0.32093
	0.34422
	0.286224
	0.324773
	0.41898

## Sheet: Fig 3 Supplement 1
WT vs WT		scrib RNAi vs WT		scrib RNAi vs fmiE59		fmiE59 scrib RNAi vs WT
Total size	% GFP cells	Total size	% RFP area	Total size	% RFP area	Total size	% RFP area
10391	0.41747	10573	0.467227	7264	0.375779	10294	0.419612
9793	0.453804	10260	0.328717	8516	0.358847	6448	0.334387
10483	0.441076	12953	0.187938	8332	0.467247	7849	0.346657
9663	0.329642	9428	0.160833	14102	0.358589	6044	0.364149
9726	0.420694	8688	0.499068	7225	0.387433	15241	0.312378
10372	0.4997	8715	0.490248	8827	0.36432	12055	0.122757
14141	0.459875	8207	0.533201	9546	0.333754	7730	0.281916
14531	0.339257	10266	0.341475	13256	0.509953	7557	0.10826
10217	0.446164	8316	0.337476	12361	0.33731	7907	0.0684746
9775	0.349418	7503	0.270918	14280	0.416417	6093	0.171784
13092	0.420082			16519	0.322115
13124	0.371474			13692	0.348796
14492	0.416217			16244	0.502422
12743	0.426305			12509	0.445978
				7150	0.302074
				10430	0.345739
				10307	0.277041
				8306	0.366977
				9832	0.250729
				12500	0.280494

## Sheet: Fig 4O
Disc	WT	>>Myc
1	4	1
2	1	2
3	3	1
4	6	0
5	1	1
6	0	1
7	2	4
8	2	2
9	2	9
10	12	2
11	1	0
12	0	3
13	0	1
14	2	1

## Sheet: Fig 4P
Disc	WT	>>Myc fmiE59
1	5	37
2	1	85
3	1	17
4	0	18
5	22	27
6	15	30
7	9	38
8	5	47
9	3	56
10	2	12
11	3	83
12	2	23
13	3	22

## Sheet: Fig 4S
Control	>>Myc	fmiE59 >>Myc
-0.0266279	0.21448	-0.324777
0.0316745	0.339051	-0.172765
-0.0529735	0.336941	-0.175054
-0.0718805	0.391626	-0.230382
-0.0862105	0.164311	-0.283373
0.0205825	0.203772	-0.451794
0.0618132	0.136057	-0.333789
0.122076	0.181508	-0.101119
-0.0604035	0.181187	-0.251014
		-0.128144
		-0.229479
		-0.187026
		-0.419728

## Sheet: Fig 5C
Disc	GFP cells	RFP cells	GFP/RFP
1	3349	1393	0.380964
2	2514	735	0.534078
3	1397	594	0.37141
4	1881	1232	0.183778
5	1952	1301	0.176203
6	2473	752	0.517006
7	2065	1004	0.313186
8	2283	862	0.422999
9	1534	1247	0.0899589
10	1725	1546	0.0475796
11	1692	879	0.284411
12	2797	831	0.527091
